# Supplementary material
Source: publisher site journal article supplement (doi:10.18632/aging.206389)
Supplement: Supplementary file 1 [file aging-v18i1-206389-supplementary-material-SD3.xlsx]

## Sheet: All articles
patient_id	study_id	diagnosis	subtype	age_years	deceased	cause_of_death	aggregate	rob_category	is_own_center
1	35491649	1	RD-ZMPSTE24	0.17	1	Respiratory Failure	0	Low	0
2	40802724	0	HGPS	17	0		0	Low	0
3	31856865	1	MAD-B	3.16	0		0	Low	0
4	31856865	1	MAD-B	6.75	0		0	Low	0
5	31856865	1	MAD-B	11.67	0		0	Low	0
6	31856865	1	MAD-B	21	0		0	Low	0
7	31856865	1	MAD-B	21	0		0	Low	0
8	31856865	1	MAD-B	24	0		0	Low	0
9	31856865	1	MAD-B	36	0		0	Low	0
10	31856865	1	MAD-B	44	1	Cardiovascular Failure	0	Low	0
11	27567006	0	HGPS	13	0		0	Low	0
12	29377371	1	HGPS	2.5	0		0	Low	0
13	25260550	1	RD-ZMPSTE24	0.10	1	NA	0	High	0
14	25260550	1	RD-ZMPSTE24	0.10	1	NA	0	High	0
15	25260550	1	RD-ZMPSTE24	0.10	1	NA	0	High	0
16	22495976	1	RD-ZMPSTE24	0.003	1	NA	0	Low	0
17	22495976	1	RD-ZMPSTE24	0.03	1	NA	0	Low	0
18	22495976	1	RD-ZMPSTE24	0.0036	1	NA	0	Low	0
19	20798379	1	HGPS	9.9	1	Cardiovascular Failure	0	Moderate	0
20	20798379	1	HGPS	14	1	Cardiovascular Failure	0	Moderate	0
21	15317753	1	RD-LMNA	0.42	0		0	Low	0
22	15317753	1	RD-LMNA	0.5	1	Respiratory Failure	0	Low	0
23	12056972	0	RD-clin	0.014	1	Respiratory Failure	0	Low	0
24	15317753	1	RD-ZMPSTE24	0.0014	1	Respiratory Failure	0	Low	0
25	15317753	1	RD-ZMPSTE24	0.0014	1	Respiratory Failure	0	Low	0
26	15317753	1	RD-ZMPSTE24	0.0014	1	Respiratory Failure	0	Low	0
27	15317753	1	RD-ZMPSTE24	0.0014	1	Respiratory Failure	0	Low	0
28	15317753	1	RD-ZMPSTE24	0.0014	1	Respiratory Failure	0	Low	0
29	15317753	1	RD-ZMPSTE24	0.0014	1	Respiratory Failure	0	Low	0
30	15317753	1	RD-ZMPSTE24	0.0014	1	Respiratory Failure	0	Low	0
31	11149127	0	HGPS	11.42	1	Cardiovascular Failure	0	Moderate	0
32	11149127	0	HGPS	20.33	1	other	0	Moderate	0
33	319005	0	HGPS	0.67	0		0	Moderate	0
34	319005	0	HGPS	5	1	Trauma or accident	0	Moderate	0
35	29774364	0	RD-clin	0.052	1	Respiratory Failure	0	Moderate	0
36	29774364	0	RD-clin	0.052	1	Respiratory Failure	0	Moderate	0
37	29774364	0	RD-clin	0.052	1	Respiratory Failure	0	Moderate	0
38	29774364	0	RD-clin	0.052	1	Respiratory Failure	0	Moderate	0
39	22837124	0	HGPS	12	0		0	Moderate	0
40	23804595	1	RD-LMNA	0.92	1	Respiratory Failure	0	Low	0
41	8456725	0	HGPS	4.5	0		0	Low	0
42	33414362	0	HGPS	13	0		0	Low	0
43	1736653	0	MAD-clin	16	0		0	Moderate	0
44	1736653	0	MAD-clin	17.5	0		0	High	0
45	1736653	0	MAD-clin	41	0		0	High	0
46	1481855	0	RD-clin	0.011	1	Respiratory Failure	0	Moderate	0
47	1481855	0	RD-clin	0.0001	1	NA	0	Moderate	0
48	1605246	0	RD-clin	0.00006	1	other	0	Moderate	0
49	1605246	0	RD-clin	0.00006	1	other	0	Moderate	0
50	1605246	0	RD-clin	0	1	other	0	Moderate	0
51	1642279	0	MAD-clin	16	0		0	Moderate	0
52	2363426	0	RD-clin	0.33	1	Respiratory Failure	0	Low	0
53	2426945	0	RD-clin	0.0014	1	Respiratory Failure	0	Moderate	0
54	2426945	0	RD-clin	0.058	1	Respiratory Failure	0	Moderate	0
55	3605203	0	RD-clin	0.00006	1	NA	0	Low	0
56	3717214	0	MAD-clin	60	0		0	Moderate	0
57	3717214	0	MAD-clin	53	0		0	Moderate	0
58	3717214	0	MAD-clin	56	1	Cardiovascular Failure	0	Moderate	0
59	9217218	0	RD-clin	0.044	1	Respiratory Failure	0	Low	0
60	10995511	0	MAD-clin	33	0		0	Low	0
61	17935239	1	MAD-A	56	0		0	Low	0
62	18348272	1	MAD-A	7	0		0	Low	0
63	19504603	1	RD-ZMPSTE24	0.00034	1	Respiratory Failure	0	Low	0
64	19764019	1	MAD-A	5.25	0		0	Low	0
65	19764019	1	MAD-A	4.17	0		0	Low	0
66	19842191	1	RD-LMNA	2.5	1	Respiratory Failure	0	Moderate	0
67	19842191	1	RD-LMNA	2	1	Respiratory Failure	0	Moderate	0
68	19842191	1	RD-LMNA	2.5	1	Respiratory Failure	0	Moderate	0
69	20034068	1	RD-ZMPSTE24	0.077	1	NA	0	Low	0
70	20101687	1	RD-ZMPSTE24	0.019	1	Respiratory Failure	0	Low	0
71	20101687	1	RD-ZMPSTE24	0.033	1	Respiratory Failure	0	Low	0
72	20814950	1	MAD-B	4	0		0	Low	0
73	20814950	1	MAD-B	0.75	0		0	Low	0
74	27410998	1	MAD-B	15	0		0	Low	0
75	30919593	1	MAD-B	15	0		0	Low	0
76	32297714	1	HGPS	15	0		0	Low	0
77	11321244	0	RD-clin	0.016	1	Respiratory Failure	0	Low	0
78	5648940	0	HGPS	7.83	0		0	Low	0
79	19625224	1	HGPS	2	0		0	Low	0
80	12381448	0	HGPS	8	0		0	Low	0
81	32360386	0	HGPS	23.83	0		0	Moderate	0
82	1739302	0	RD-clin	0.077	1	Respiratory Failure	0	Moderate	0
83	1739302	0	RD-clin	0.115	1	Respiratory Failure	0	Moderate	0
84	1739303	0	RD-clin	0.011	1	Respiratory Failure	0	Low	0
85	1739303	0	RD-clin	0.0002	1	Respiratory Failure	0	Low	0
86	15897383	0	RD-clin	0.066	1	Sepsis	0	High	0
87	22685055	1	HGPS	0.58	0		0	Moderate	0
88	18470519	1	RD-ZMPSTE24	0.00038	1	Respiratory Failure	0	Low	0
89	21251803	1	HGPS	5	0		0	Moderate	0
90	25286833	1	MAD-A	7	0		0	Low	0
91	25286833	1	MAD-A	3.25	0		0	Low	0
92	25286833	1	MAD-A	1.83	0		0	Low	0
93	35287606	1	HGPS	5	0		0	Low	0
94	37723091	1	HGPS	0.17	0		0	Moderate	0
95	20550970	1	MAD-B	16	0		0	Low	0
96	7317281	0	MAD-clin	46	0		0	Moderate	0
97	7317281	0	MAD-clin	30	0		0	Moderate	0
98	7317281	0	MAD-clin	37	0		0	Moderate	0
99	7317281	0	MAD-clin	40	0		0	Moderate	0
100	17459035	1	HGPS	3	0		0	Low	0
101	17459035	1	HGPS	5	0		0	Low	0
102	17459035	1	HGPS	6	0		0	Low	0
103	18671782	1	RD-ZMPSTE24	0.153	1	Respiratory Failure	0	Low	0
104	18671782	1	RD-ZMPSTE24	0.123	1	Respiratory Failure	0	Low	0
105	23141186	1	HGPS	10	1	Trauma or accident	0	Low	0
106	14515974	0	RD-clin	0.016	1	Respiratory Failure	0	Moderate	0
107	14515974	0	RD-clin	0.022	1	Respiratory Failure	0	Moderate	0
108	12541091	0	HGPS	10	0		0	Moderate	0
109	26379196	1	RD-ZMPSTE24	0.044	1	Respiratory Failure	0	Moderate	0
110	26379196	1	RD-ZMPSTE24	0.063	1	Respiratory Failure	0	Moderate	0
111	27100822	1	MAD-A	59	0		0	Low	0
112	27100822	1	MAD-A	37	0		0	Low	0
113	36876346	1	RD-ZMPSTE24	0.060	1	Respiratory Failure	0	Low	0
114	17459069	1	HGPS	19	1	Cardiovascular Failure	0	Low	0
115	6467666	0	MAD-clin	23	0		0	Moderate	0
116	6467666	0	MAD-clin	27	0		0	Moderate	0
117	8131298	0	RD-clin	0.055	1	Respiratory Failure	0	Moderate	0
118	8131298	0	RD-clin	0.008	1	Respiratory Failure	0	Moderate	0
119	18435794	1	MAD-B	7.16	0		0	Low	0
120	18435794	1	MAD-B	3.42	0		0	Low	0
121	20662858	1	RD-LMNA	0.58	1	Respiratory Failure	0	Low	0
122	21108632	1	RD-ZMPSTE24	0.044	1	NA	0	Moderate	0
123	27267192	1	HGPS	6.92	0		0	Low	0
124	21108632	1	RD-ZMPSTE24	0.016	1	NA	0	Moderate	0
125	8193408	0	HGPS	0.83	0		0	Low	0
126	21267004	1	MAD-B	30 years	1	other	0	Low	0
127	22549407	1	MAD-A	4	0		0	Low	0
128	22549407	1	MAD-A	10	0		0	Low	0
129	22549407	1	MAD-A	4	0		0	Low	0
130	33422685	1	MAD-A	14	0		0	Low	0
131	33422685	1	MAD-A	12	0		0	Low	0
132	33422685	1	MAD-A	4.5	0		0	Low	0
133	33422685	1	MAD-A	9	0		0	Low	0
134	33422685	1	MAD-A	48	0		0	Low	0
135	8444237	0	RD-clin	0.17	1	Respiratory Failure	0	Moderate	0
136	8444237	0	RD-clin	0.014	1	Respiratory Failure	0	Moderate	0
137	15726408	1	HGPS	2	0		0	Low	0
138	19020898	1	RD-ZMPSTE24	0.025	1	Respiratory Failure	0	Low	0
139	34680903	1	MAD-A	27	0		0	Moderate	0
140	34680903	1	MAD-A	5	0		0	Moderate	0
141	34680903	1	MAD-A	2	0		0	Moderate	0
142	16440877	0	MAD-clin	5	0		0	Low	0
143	16440877	0	MAD-clin	17	0		0	Low	0
144	12913070	1	MAD-B	24	1	other	0	Low	0
145	20827016	0	HGPS	4	0		0	High	0
146	22011502	0	HGPS	16.5	1	Cardiovascular Failure	0	Low	0
147	19383993	1	RD-ZMPSTE24	0.005	1	Respiratory Failure	0	High	0
148	19383993	0	RD-clin	0	1	NA	0	High	0
149	12522278	0	RD-clin	0.027	1	Respiratory Failure	0	Low	0
150	15311567	0	MAD-clin	0.75	0		0	Low	0
151	9732012	0	MAD-clin	9	0		0	High	0
152	9732012	0	MAD-clin	6	0		0	High	0
153	9732012	0	MAD-clin	3	0		0	High	0
154	9732012	0	MAD-clin	15	0		0	High	0
155	34830197	1	HGPS	12.58	0		0	Low	0
156	12452985	0	HGPS	12.5	0		0	Low	0
157	7593806	0	MAD-clin	37	0		0	High	0
158	7593806	0	MAD-clin	26	0		0	High	0
159	24034385	1	HGPS	0.67	0		0	Low	0
160	659773	0	HGPS	9	0		0	Low	0
161	15998779	1	MAD-A	18	0		0	Low	0
162	15998779	1	MAD-A	21	0		0	Low	0
163	17848409	1	MAD-A	27	0		0	Low	0
164	18796515	1	MAD-A	7	0		0	Low	0
165	11426829	0	RD-clin	0.0074	1	NA	0	Low	0
166	10380434	0	HGPS	4.58	0		0	High	0
167	30461078	1	RD-ZMPSTE24	0.069	1	Respiratory Failure	0	Low	0
168	33590899	1	HGPS	15	0		0	Moderate	0
169	33590899	1	HGPS	3	0		0	Moderate	0
170	33590899	1	HGPS	4	0		0	Moderate	0
171	33590899	1	HGPS	2	0		0	Moderate	0
172	33590899	1	HGPS	0.92	0		0	Moderate	0
173	33590899	1	HGPS	6	0		0	Moderate	0
174	33590899	1	HGPS	6	0		0	Moderate	0
175	12768443	1	HGPS	10	0		0	Moderate	0
176	12768443	1	HGPS	10	0		0	Moderate	0
177	12768443	1	HGPS	13	0		0	Moderate	0
178	12768443	1	HGPS	5	0		0	Moderate	0
179	12768443	1	HGPS	9	0		0	Moderate	0
180	12768443	1	HGPS	6	0		0	Moderate	0
181	12768443	1	MAD-A	28	0		0	Moderate	0
182	28878338	1	HGPS	5	0		0	Low	0
183	28878338	1	HGPS	15	0		0	Low	0
184	28878338	1	HGPS	4	0		0	Low	0
185	28878338	1	HGPS	6	0		0	Low	0
186	28878338	1	HGPS	8	0		0	Low	0
187	28878338	1	HGPS	10	1	other	0	Low	0
188	28878338	1	HGPS	15	1	Ischemic stroke	0	Low	0
189	17152860	1	MAD-B	37	1	other	0	Low	0
190	22148005	1	HGPS	4	0		0	Low	0
191	10087745	0	HGPS	3	0		0	Low	0
192	284134	0	HGPS	14.33	1	Respiratory Failure	0	Low	0
193	2352259	0	RD-clin	0.134	1	NA	0	Moderate	0
194	2352259	0	RD-clin	0.019	1	NA	0	Moderate	0
195	2352259	0	RD-clin	0.00006	1	NA	0	Moderate	0
196	14627682	1	MAD-A	12	0		0	Low	0
197	2957478	0	HGPS	14	0		0	Moderate	0
198	4552697	0	HGPS	4.5	0		0	Moderate	0
199	4552697	0	HGPS	14.5	0		0	Moderate	0
200	4552697	0	HGPS	8.5	0		0	Moderate	0
201	4552697	0	HGPS	7	1	NA	0	Moderate	0
202	17642424	1	HGPS	3.5	1	other	0	Low	0
203	19373113	0	HGPS	8.33	0		0	Moderate	0
204	22433957	0	HGPS	13	0		0	Moderate	0
205	22433957	0	HGPS	11	1	Cardiovascular Failure	0	Moderate	0
206	19474589	1	RD-LMNA	0.096	1	Respiratory Failure	0	Low	0
207	8182686	0	HGPS	1.50	0		0	Low	0
208	25629449	1	MAD-B	1.25	0		0	Low	0
209	24793088	0	MAD-clin	14	0		0	High	0
210	24123119	0	MAD-clin	38	0		0	Moderate	0
211	20150858	0	HGPS	4	0		0	Low	0
212	32799251	0	HGPS	5	0		0	Low	0
213	10591957	0	RD-clin	0.055	1	Respiratory Failure	0	Low	0
214	20401475	0	HGPS	18	0		0	High	0
215	1745628	0	HGPS	1.8	0		0	Low	0
216	10337683	0	RD-clin	0.0030	1	Respiratory Failure	0	Low	0
217	10990576	0	HGPS	1.5	0		0	Low	0
218	11860576	0	RD-clin	0.036	1	Respiratory Failure	0	Low	0
219	21121943	1	RD-ZMPSTE24	0.038	1	Respiratory Failure	0	Low	0
220	25556323	1	HGPS	6	0		0	Low	0
221	34647350	1	RD-ZMPSTE24	0.060	1	Respiratory Failure	0	Moderate	0
222	34647350	1	RD-ZMPSTE24	0.047	1	Respiratory Failure	0	Moderate	0
223	34647350	1	RD-ZMPSTE24	0.014	1	Respiratory Failure	0	Moderate	0
224	38965877	1	RD-ZMPSTE24	0.025	1	Respiratory Failure	0	Low	0
225	22746836	1	RD-ZMPSTE24	0.121	1	Respiratory Failure	0	Low	0
226	23597553	0	RD-clin	0	1	NA	0	Moderate	0
227	23597553	1	RD-ZMPSTE24	0.044	1	Respiratory Failure	0	Moderate	0
228	11842974	0	HGPS	20	1	Trauma or accident	0	Low	0
229	8152880	0	RD-clin	0.0036	1	other	0	Low	0
230	11494296	0	RD-clin	0.0055	1	Respiratory Failure	0	Moderate	0
231	11494296	0	RD-clin	0.00080	1	Respiratory Failure	0	Moderate	0
232	11494296	0	RD-clin	0.00012	1	NA	0	Moderate	0
233	17286315	0	RD-clin	0.014	1	Respiratory Failure	0	Low	0
234	17286315	0	RD-clin	0.00006	1	Respiratory Failure	0	Low	0
235	17511383	1	HGPS	12	0		0	Low	0
236	38808865	1	MAD-A	6	0		0	Low	0
237	11201039	0	MAD-clin	7	0		0	Low	0
238	28540519	0	HGPS	8	0		0	Moderate	0
239	31786425	0	HGPS	19	0		0	Moderate	0
240	663743	0	HGPS	0.67	1	NA	0	Low	0
241	19102058	0	RD-clin	0.205	1	Respiratory Failure	0	Low	0
242	9286026	0	RD-clin	0.00006	1	Respiratory Failure	0	Low	0
243	18844329	0	RD-clin	0.00006	1	NA	0	Low	0
244	31014187	0	HGPS	14	1	Cardiovascular Failure	0	Low	0
245	36927562	1	MAD-B	2	0			Low	0
246	8128740	0	HGPS	24	1	Cardiovascular Failure	0	Low	0
247	10722246	0	HGPS	20	1	Trauma or accident	0	Moderate	0
248	4447659	0	HGPS	13	1	NA	0	Low	0
249	5506943	0	HGPS	10.75	1	Cardiovascular Failure	0	Low	0
250	13165959	0	HGPS	11.25	1	Cardiovascular Failure	0	Low	0
251	10.1001/archpedi.1945.02020170002001	0	HGPS	7.5	1	Cardiovascular Failure	0	Low	0
252	21976890	0	HGPS	12	0		0	Low	0
253	36523395	1	HGPS	4	0		0	Low	0
254	36523395	1	HGPS	8.5	0		0	Low	0
255	18256394	1	HGPS	1.5	0		0	Low	0
256	18256394	1	HGPS	1.75	0		0	Low	0
257	18256394	1	HGPS	2.1	0		0	Low	0
258	18256394	1	HGPS	2.25	0		0	Low	0
259	18256394	1	HGPS	4.67	0		0	Low	0
260	18256394	1	HGPS	5.0	0		0	Low	0
261	18256394	1	HGPS	6.83	0		0	Low	0
262	18256394	1	HGPS	6.92	0		0	Low	0
263	18256394	1	HGPS	8.42	0		0	Low	0
264	18256394	1	HGPS	8.42	0		0	Low	0
265	18256394	1	HGPS	8.58	0		0	Low	0
266	18256394	1	HGPS	10.17	0		0	Low	0
267	18256394	1	HGPS	13.42	1	Cardiovascular Failure	0	Low	0
268	18256394	1	HGPS	17.92	1	Cardiovascular Failure	0	Low	0
269	6859116	0	RD-clin	0.008	1	Respiratory Failure	0	Moderate	0
270	6859116	0	RD-clin	0.016	1	Respiratory Failure	0	Moderate	0
271	3740097	0	RD-clin	0.0001	1	Respiratory Failure	0	Low	0
272	3840649	0	RD-clin	0.000006	1	Respiratory Failure	0	Low	0
273	3840649	0	RD-clin	0.011	1	Respiratory Failure	0	Low	0
274	3840649	0	RD-clin	0.0027	1	Respiratory Failure	0	Low	0
275	3840649	0	RD-clin	0.00006	1	Respiratory Failure	0	Low	0
276	8911903	0	RD-clin	0.096	1	Respiratory Failure	0	Low	0
277	10.1016/j.dsi.2015.10.003	1	RD-ZMPSTE24	0.25	1	Respiratory Failure	0	Low	0
278	1476923	0	RD-clin	0.058	1	Respiratory Failure	0	Low	0
279	36386051	1	RD-ZMPSTE24	0.030	1	Respiratory Failure	0	Low	0
280	12788894	1	MAD-A	20	0		0	Moderate	0
281	12788894	1	MAD-A	16	0		0	Moderate	0
282	12788894	1	MAD-A	12	0		0	Moderate	0
283	15937076	1	MAD-B	2.75	1	Respiratory Failure	0	Low	0
284	6237548	0	HGPS	11.5	1	Cardiovascular Failure	0	Low	0
285	13139804	0	HGPS	9	1	other	0	Low	0
286	1262674	0	HGPS	20	1	other	0	Low	0
287	14468738	0	HGPS	12.6	1	Cardiovascular Failure	0	Low	0
288	15418991	0	HGPS	27.5	1	Cardiovascular Failure	0	Low	0
289	5415913	0	HGPS	17	1	Cardiovascular Failure	0	Moderate	0
290	5415913	0	HGPS	11.6	1	Cardiovascular Failure	0	Moderate	0
291	10.1001/archpedi.1945.02020170002001	0	HGPS	7.6	1	Cardiovascular Failure	0	Low	0
292	20949529	1	MAD-A	43	0		0	Low	0
293	CR-01	1	HGPS	7	1	Trauma or accident	0	na	1
294	CR-02	1	HGPS	16	1	Cardiovascular Failure	0	na	1
