# Supplementary material
Source: publisher site journal article supplement (doi:10.18632/aging.206389)
Supplement: Supplementary file 2 [file aging-v18i1-206389-supplementary-material-SD4.xlsx]

## Sheet: aggregate
patient_id	study_id	diagnosis	subtype	age_years	deceased	cause_of_death	aggregate	rob_category	is_own_center
	29710166	1	HGPS	14.5	1	Cardiovascular Failure	1	Low	0
	29710166	1	HGPS	14.5	1	Cardiovascular Failure	1	Low	0
	29710166	1	HGPS	14.5	1	Cardiovascular Failure	1	Low	0
	29710166	1	HGPS	14.5	1	Cardiovascular Failure	1	Low	0
	29710166	1	HGPS	14.5	1	Cardiovascular Failure	1	Low	0
	29710166	1	HGPS	14.5	1	Cardiovascular Failure	1	Low	0
	29710166	1	HGPS	14.5	1	Cardiovascular Failure	1	Low	0
	29710166	1	HGPS	14.5	1	Cardiovascular Failure	1	Low	0
	29710166	1	HGPS	14.5	1	Cardiovascular Failure	1	Low	0
	29710166	1	HGPS	14.5	1	Cardiovascular Failure	1	Low	0
	29710166	1	HGPS	14.5	1	Cardiovascular Failure	1	Low	0
	29710166	1	HGPS	14.5	1	Cardiovascular Failure	1	Low	0
	29710166	1	HGPS	14.5	1	Cardiovascular Failure	1	Low	0
	29710166	1	HGPS	14.5	1	Cardiovascular Failure	1	Low	0
	29710166	1	HGPS	14.5	1	Cardiovascular Failure	1	Low	0
	29710166	1	HGPS	14.5	1	Cardiovascular Failure	1	Low	0
	29710166	1	HGPS	14.5	1	Cardiovascular Failure	1	Low	0
	29710166	1	HGPS	14.5	1	Cardiovascular Failure	1	Low	0
	29710166	1	HGPS	14.5	1	Cardiovascular Failure	1	Low	0
	29710166	1	HGPS	14.5	1	Cardiovascular Failure	1	Low	0
	29710166	1	HGPS	14.5	1	Cardiovascular Failure	1	Low	0
	29710166	1	HGPS	14.5	1	Cardiovascular Failure	1	Low	0
	29710166	1	HGPS	14.5	1	Cardiovascular Failure	1	Low	0
	29710166	1	HGPS	14.5	1	Cardiovascular Failure	1	Low	0
	29710166	1	HGPS	14.5	1	Cardiovascular Failure	1	Low	0
	29710166	1	HGPS	14.5	1	Cardiovascular Failure	1	Low	0
	29710166	1	HGPS	14.5	1	Cardiovascular Failure	1	Low	0
	29710166	1	HGPS	14.5	1	Cardiovascular Failure	1	Low	0
	29710166	1	HGPS	14.5	1	Cardiovascular Failure	1	Low	0
	29710166	1	HGPS	14.5	1	Cardiovascular Failure	1	Low	0
	29710166	1	HGPS	14.5	1	Cardiovascular Failure	1	Low	0
	29710166	1	HGPS	14.5	1	Cardiovascular Failure	1	Low	0
	29710166	1	HGPS	14.5	1	Cardiovascular Failure	1	Low	0
	29710166	1	HGPS	14.5	1	Cardiovascular Failure	1	Low	0
	29710166	1	HGPS	14.5	1	Cardiovascular Failure	1	Low	0
	29710166	1	HGPS	14.5	1	Cardiovascular Failure	1	Low	0
	29710166	1	HGPS	14.5	1	Cardiovascular Failure	1	Low	0
	29710166	1	HGPS	14.5	1	Cardiovascular Failure	1	Low	0
	29710166	1	HGPS	14.5	1	Cardiovascular Failure	1	Low	0
	29710166	1	HGPS	14.5	1	Cardiovascular Failure	1	Low	0
	29710166	1	HGPS	14.5	1	Cardiovascular Failure	1	Low	0
	29710166	1	HGPS	14.5	1	Cardiovascular Failure	1	Low	0
	29710166	1	HGPS	14.5	1	Cardiovascular Failure	1	Low	0
	29710166	1	HGPS	14.5	1	Cardiovascular Failure	1	Low	0
	29710166	1	HGPS	14.5	1	Cardiovascular Failure	1	Low	0
	29710166	1	HGPS	14.5	1	Cardiovascular Failure	1	Low	0
	29710166	1	HGPS	14.5	1	Cardiovascular Failure	1	Low	0
	29710166	1	HGPS	14.5	1	Cardiovascular Failure	1	Low	0
	29710166	1	HGPS	14.5	1	Cardiovascular Failure	1	Low	0
	29710166	1	HGPS	14.5	1	Cardiovascular Failure	1	Low	0
	29710166	1	HGPS	14.5	1	Cardiovascular Failure	1	Low	0
	29710166	1	HGPS	14.5	1	Cardiovascular Failure	1	Low	0
	29710166	1	HGPS	14.5	1	Cardiovascular Failure	1	Low	0
	29710166	1	HGPS	14.5	1	Cardiovascular Failure	1	Low	0
	29710166	1	HGPS	14.5	1	Cardiovascular Failure	1	Low	0
	29710166	1	HGPS	14.5	1	Ischemic stroke	1	Low	0
	29710166	1	HGPS	14.5	1	Ischemic stroke	1	Low	0
	29710166	1	HGPS	14.5	1	Trauma or accident	1	Low	0
	29710166	1	HGPS	14.5	1	Trauma or accident	1	Low	0
	29710166	1	HGPS	14.5	1	Trauma or accident	1	Low	0
	29710166	1	HGPS	14.5	1	Trauma or accident	1	Low	0
	29710166	1	HGPS	14.5	1	Trauma or accident	1	Low	0
	29710166	1	HGPS	14.5	1	Trauma or accident	1	Low	0
	29710166	1	HGPS	14.5	1	other	1	Low	0
	29710166	1	HGPS	14.5	1	other	1	Low	0
	29710166	1	HGPS	14.5	1	other	1	Low	0
	29710166	1	HGPS	14.5	1	other	1	Low	0
	29710166	1	HGPS	14.5	1	other	1	Low	0
	29710166	1	HGPS	14.5	1	other	1	Low	0
	29710166	1	HGPS	14.5	1	NA	1	Low	0
	29710166	1	HGPS	14.5	1	NA	1	Low	0
	29710166	1	HGPS	14.5	1	NA	1	Low	0
	29710166	1	HGPS	14.5	1	NA	1	Low	0
	29710166	1	HGPS	14.5	1	NA	1	Low	0
	29710166	1	HGPS	14.5	1	NA	1	Low	0
	29710166	1	HGPS	14.5	1	NA	1	Low	0
	29710166	1	HGPS	14.5	1	NA	1	Low	0
	29710166	1	HGPS	14.5	1	NA	1	Low	0
	29710166	1	HGPS	14.5	1	NA	1	Low	0
	29710166	1	HGPS	14.5	1	NA	1	Low	0
	29710166	1	HGPS	14.5	1	NA	1	Low	0
	29710166	1	HGPS	14.5	1	NA	1	Low	0
	29710166	1	HGPS	14.5	1	NA	1	Low	0
	29710166	1	HGPS	14.5	1	NA	1	Low	0
	29710166	1	HGPS	14.5	1	NA	1	Low	0
	29710166	1	HGPS	14.5	1	NA	1	Low	0
	29710166	1	HGPS	14.5	1	NA	1	Low	0
	29710166	1	HGPS	14.5	1	NA	1	Low	0
	29710166	1	HGPS	14.5	1	NA	1	Low	0
	29710166	1	HGPS	14.5	1	NA	1	Low	0
	29710166	1	HGPS	14.5	1	NA	1	Low	0
	29710166	1	HGPS	14.5	1	NA	1	Low	0
	29710166	1	HGPS	14.5	1	NA	1	Low	0
	29710166	1	HGPS	14.5	1	NA	1	Low	0
	29710166	1	HGPS	14.5	1	NA	1	Low	0
	29710166	1	HGPS	14.5	1	NA	1	Low	0
	29710166	1	HGPS	14.5	1	NA	1	Low	0
	29710166	1	HGPS	14.5	1	NA	1	Low	0
	29710166	1	HGPS	14.5	1	NA	1	Low	0
	29710166	1	HGPS	14.5	1	NA	1	Low	0
	29710166	1	HGPS	14.5	1	NA	1	Low	0
	29710166	1	HGPS	14.5	1	NA	1	Low	0
	29710166	1	HGPS	14.5	1	NA	1	Low	0
	29710166	1	HGPS	14.5	1	NA	1	Low	0
	29710166	1	HGPS	14.5	1	NA	1	Low	0
	29710166	1	HGPS	14.5	1	NA	1	Low	0
	29710166	1	HGPS	14.5	1	NA	1	Low	0
	29710166	1	HGPS	14.5	1	NA	1	Low	0
	29710166	1	HGPS	14.5	1	NA	1	Low	0
	29710166	1	HGPS	14.5	1	NA	1	Low	0
	29710166	1	HGPS	14.5	1	NA	1	Low	0
	29710166	1	HGPS	14.5	1	NA	1	Low	0
	29710166	1	HGPS	14.5	1	NA	1	Low	0
	29710166	1	HGPS	14.5	1	NA	1	Low	0
	29710166	1	HGPS	14.5	1	NA	1	Low	0
	29710166	1	HGPS	14.5	1	NA	1	Low	0
	29710166	1	HGPS	14.5	1	NA	1	Low	0
	29710166	1	HGPS	14.5	1	NA	1	Low	0
	29710166	1	HGPS	14.5	1	NA	1	Low	0
	29710166	1	HGPS	14.5	1	NA	1	Low	0
	29710166	1	HGPS	14.5	1	NA	1	Low	0
	29710166	1	HGPS	14.5	1	NA	1	Low	0
	29710166	1	HGPS	14.5	1	NA	1	Low	0
	29710166	1	HGPS	14.5	1	NA	1	Low	0
	29710166	1	HGPS	14.5	0		1	Low	0
	29710166	1	HGPS	14.5	0		1	Low	0
	29710166	1	HGPS	14.5	0		1	Low	0
	29710166	1	HGPS	14.5	0		1	Low	0
	29710166	1	HGPS	14.5	0		1	Low	0
	29710166	1	HGPS	14.5	0		1	Low	0
	29710166	1	HGPS	14.5	0		1	Low	0
	29710166	1	HGPS	14.5	0		1	Low	0
	29710166	1	HGPS	14.5	0		1	Low	0
	29710166	1	HGPS	14.5	0		1	Low	0
	29710166	1	HGPS	14.5	0		1	Low	0
	29710166	1	HGPS	14.5	0		1	Low	0
	29710166	1	HGPS	14.5	0		1	Low	0
	29710166	1	HGPS	14.5	0		1	Low	0
	29710166	1	HGPS	14.5	0		1	Low	0
	29710166	1	HGPS	14.5	0		1	Low	0
	29710166	1	HGPS	14.5	0		1	Low	0
	29710166	1	HGPS	14.5	0		1	Low	0
	29710166	1	HGPS	14.5	0		1	Low	0
	29710166	1	HGPS	14.5	0		1	Low	0
	29710166	1	HGPS	14.5	0		1	Low	0
	29710166	1	HGPS	14.5	0		1	Low	0
	29710166	1	HGPS	14.5	0		1	Low	0
	29710166	1	HGPS	14.5	0		1	Low	0
	29710166	1	HGPS	14.5	0		1	Low	0
	29710166	1	HGPS	14.5	0		1	Low	0
	29710166	1	HGPS	14.5	0		1	Low	0
	29710166	1	HGPS	14.5	0		1	Low	0
	29710166	1	HGPS	14.5	0		1	Low	0
	29710166	1	HGPS	14.5	0		1	Low	0
	29710166	1	HGPS	14.5	0		1	Low	0
	29710166	1	HGPS	14.5	0		1	Low	0
	29710166	1	HGPS	14.5	0		1	Low	0
	29710166	1	HGPS	14.5	0		1	Low	0
	29710166	1	HGPS	14.5	0		1	Low	0
	29710166	1	HGPS	14.5	0		1	Low	0
	29710166	1	HGPS	14.5	0		1	Low	0
	29710166	1	HGPS	14.5	0		1	Low	0
	29710166	1	HGPS	14.5	0		1	Low	0
	29710166	1	HGPS	14.5	0		1	Low	0
	29710166	1	HGPS	14.5	0		1	Low	0
	29710166	1	HGPS	14.5	0		1	Low	0
	29710166	1	HGPS	14.5	0		1	Low	0
	29710166	1	HGPS	14.5	0		1	Low	0
	29710166	1	HGPS	14.5	0		1	Low	0
	29710166	1	HGPS	14.5	0		1	Low	0
	29710166	1	HGPS	14.5	0		1	Low	0
	29710166	1	HGPS	14.5	0		1	Low	0
	29710166	1	HGPS	14.5	0		1	Low	0
	29710166	1	HGPS	14.5	0		1	Low	0
	29710166	1	HGPS	14.5	0		1	Low	0
	29710166	1	HGPS	14.5	0		1	Low	0
	29710166	1	HGPS	14.5	0		1	Low	0
	29710166	1	HGPS	14.5	0		1	Low	0
	29710166	1	HGPS	14.5	0		1	Low	0
	29710166	1	HGPS	14.5	0		1	Low	0
	29710166	1	HGPS	14.5	0		1	Low	0
	29710166	1	HGPS	14.5	0		1	Low	0
	29710166	1	HGPS	14.5	0		1	Low	0
	29710166	1	HGPS	14.5	0		1	Low	0
	29710166	1	HGPS	14.5	0		1	Low	0
	29710166	1	HGPS	14.5	0		1	Low	0
	29710166	1	HGPS	14.5	0		1	Low	0
	29710166	1	HGPS	14.5	0		1	Low	0
	29710166	1	HGPS	14.5	0		1	Low	0
	29710166	1	HGPS	14.5	0		1	Low	0
	29710166	1	HGPS	14.5	0		1	Low	0
	29710166	1	HGPS	14.5	0		1	Low	0
	29710166	1	HGPS	14.5	0		1	Low	0
	29710166	1	HGPS	14.5	0		1	Low	0
	29710166	1	HGPS	14.5	0		1	Low	0
	29710166	1	HGPS	14.5	0		1	Low	0
	29710166	1	HGPS	14.5	0		1	Low	0
	29710166	1	HGPS	14.5	0		1	Low	0
	29710166	1	HGPS	14.5	0		1	Low	0
	29710166	1	HGPS	14.5	0		1	Low	0
	29710166	1	HGPS	14.5	0		1	Low	0
	29710166	1	HGPS	14.5	0		1	Low	0
	29710166	1	HGPS	14.5	0		1	Low	0
	29710166	1	HGPS	14.5	0		1	Low	0
	29710166	1	HGPS	14.5	0		1	Low	0
	29710166	1	HGPS	14.5	0		1	Low	0
	29710166	1	HGPS	14.5	0		1	Low	0
	29710166	1	HGPS	14.5	0		1	Low	0
	29710166	1	HGPS	14.5	0		1	Low	0
	29710166	1	HGPS	14.5	0		1	Low	0
	29710166	1	HGPS	14.5	0		1	Low	0
	29710166	1	HGPS	14.5	0		1	Low	0
	29710166	1	HGPS	14.5	0		1	Low	0
	29710166	1	HGPS	14.5	0		1	Low	0
	29710166	1	HGPS	14.5	0		1	Low	0
	29710166	1	HGPS	14.5	0		1	Low	0
	29710166	1	HGPS	14.5	0		1	Low	0
	29710166	1	HGPS	14.5	0		1	Low	0
	29710166	1	HGPS	14.5	0		1	Low	0
	29710166	1	HGPS	14.5	0		1	Low	0
	29710166	1	HGPS	14.5	0		1	Low	0
	29710166	1	HGPS	14.5	0		1	Low	0
	29710166	1	HGPS	14.5	0		1	Low	0
	29710166	1	HGPS	14.5	0		1	Low	0
	29710166	1	HGPS	14.5	0		1	Low	0
	29710166	1	HGPS	14.5	0		1	Low	0
	29710166	1	HGPS	14.5	0		1	Low	0
	29710166	1	HGPS	14.5	0		1	Low	0
	29710166	1	HGPS	14.5	0		1	Low	0
	29710166	1	HGPS	14.5	0		1	Low	0
	29710166	1	HGPS	14.5	0		1	Low	0
	29710166	1	HGPS	14.5	0		1	Low	0
	29710166	1	HGPS	14.5	0		1	Low	0
	29710166	1	HGPS	14.5	0		1	Low	0
	29710166	1	HGPS	14.5	0		1	Low	0
	29710166	1	HGPS	14.5	0		1	Low	0
	29710166	1	HGPS	14.5	0		1	Low	0
	29710166	1	HGPS	14.5	0		1	Low	0
	29710166	1	HGPS	14.5	0		1	Low	0
	29710166	1	HGPS	14.5	0		1	Low	0
	29710166	1	HGPS	14.5	0		1	Low	0
	29710166	1	HGPS	14.5	0		1	Low	0
	29710166	1	HGPS	14.5	0		1	Low	0
	29710166	1	HGPS	14.5	0		1	Low	0
	29710166	1	HGPS	14.5	0		1	Low	0
	29710166	1	HGPS	14.5	0		1	Low	0
	29710166	1	HGPS	14.5	0		1	Low	0
	29710166	1	HGPS	14.5	0		1	Low	0
	29710166	1	HGPS	14.5	0		1	Low	0
	29710166	1	HGPS	14.5	0		1	Low	0
	29710166	1	HGPS	14.5	0		1	Low	0
	29710166	1	HGPS	14.5	0		1	Low	0
	29710166	1	HGPS	14.5	0		1	Low	0
	29710166	1	HGPS	14.5	0		1	Low	0
	29710166	1	HGPS	14.5	0		1	Low	0
	29710166	1	HGPS	14.5	0		1	Low	0
	29710166	1	HGPS	14.5	0		1	Low	0
	29710166	1	HGPS	14.5	0		1	Low	0
