# Supplementary material
Source: publisher site journal article supplement (doi:10.18632/aging.206389)
Supplement: Supplementary file 3 [file aging-v18i1-206389-supplementary-material-SD5.xlsx]

## Sheet: All articles
Bibliographic data			Clinical subtype	Diagnostic type	Genetic variant	Gene	N patients	N deaths	Last reported age	Age at death	Cause of death							Risk of bias assessment
PMID	Year of publication	First author									Cardiovascular Failure	Ischemic stroke	Trauma or accident	Respiratory Failure	Sepsis	other	n.a. (unknown)	Scale	Risk
35491649	2022	Hsu, T.-C.	RD ZMPSTE24	Genetic diagnosis	c.838_841del (p.Phe280Thrfs*4), c.210dupT (p.Tyr70Leufs*5)	ZMPSTE24	1	1		0.17 years				1				JBI for case reports	Low risk (8/8)
40802724	2023	Parajuli, S.	HGPS	Clinical diagnosis			1	0	17 years									JBI for case reports	Low risk (4/5)
31856865	2019	Hitzert, M.M	MAD-B	Genetic diagnosis	c.1196A>G (p.Tyr399Cys)	ZMPSTE24	8	1	3.16 years, 6.75 years , 11.67 years, 21 years, 21 years, 24 years, 36 years	44 years	1							JBI for case series	Low risk (9/9)
27567006	2017	Roggen, M.	HGPS	Clinical diagnosis			1	0	13 years									JBI for case reports	Low risk (7/8)
29377371	2018	Grana, A.G.	HGPS	Genetic diagnosis	c.1824C>T (p.Gly608Gly)	LMNA	1	0	2.5 years									JBI for case reports	Low risk (4/5)
25260550	2014	Hou, J.-W.	RD ZMPSTE24	Genetic diagnosis	c.715G>T (p.Glu239Ter)	ZMPSTE24	3	3		37.5 days, 37.5 days, 37.5 days							3	JBI for case series	High risk (3/8)
22495976	2012	Loucks, C.	RD ZMPSTE24	Genetic diagnosis	c.1085dupT (p.Leu362Phefs*19)	ZMPSTE24	3	3		1 day, 10 days, 1.33 days							3	JBI for case series	Low risk (8/9)
20798379	2010	Olive, M.	HGPS	Genetic diagnosis	c.1824C>T (p.Gly608Gly)	LMNA	2	2		9.9 years, 14 years	2							JBI for case series	Moderate risk (6/9)
15317753	2004	Navarro, C.L.	RD LMNA	Genetic diagnosis	c.1968+1G>A, c.1824C>T (p.Gly608Gly)	LMNA	2	1	0.42 years	0.5 years				1				JBI for case series	Low risk (8/9)
12056972	2002	Abrahamson, T.G.	RD	Clinical diagnosis			1	1	5 days	5 days				1				JBI for case reports	Low risk (5/5)
15317753	2004	Navarro, C.L.	RD ZMPSTE24	Genetic diagnosis	c.1085_1086insT (p.Leu362Phefs*19)	ZMPSTE24	7	7		0.5 days, 0.5 days, 0.5 days, 0.5 days, 0.5 days, 0.5 days, 0.5 days,				7				JBI for case series	Low risk (8/9)
11149127	2000	Delahunt, B.	HGPS	Clinical diagnosis			2	2		11.42 years, 20.33 years	1					1		JBI for case series	Moderate risk (6/9)
319005	1977	Rautenstrauch, T.	HGPS	Clinical diagnosis			2	1	0.67 years	5 years			1					JBI for case series	Moderate risk (6/8)
29774364	2018	Bidier, M.	RD	Clinical diagnosis			4	4		19 days, 19 days, 19 days, 19 days				4				JBI for case series	Low risk (8/9)
22837124	2012	Espandar, R.	HGPS	Clinical diagnosis			1	0	12 years									JBI for case reports	Moderate risk (6/8)
23804595	2013	Starke, S.	RD LMNA	Genetic diagnosis	c.1303C>T (p.Arg435Cys)	LMNA	1	1		0.92 years				1				JBI for case reports	Low risk (5/5)
8456725	1993	Smith, A.S.	HGPS	Clinical diagnosis			1	0	4.5 years									JBI for case reports	Low risk (5/5)
33414362	2021	Pongbangli, N.	HGPS	Clinical diagnosis			1	0	13 years									JBI for case reports	Low risk (5/6)
1736653	1992	Freindenberg, G.R.	MAD	Clinical diagnosis			3	0	16 years, 17.5 years, 41 years									JBI for case series	Moderate Risk (5/9)
1481855	1992	Hamel, B.C.	RD	Clinical diagnosis			2	2		4 days, 0.042 days				1			1	JBI for case series	Moderate risk (5/8)
1605246	1992	Verloes, A.	RD	Clinical diagnosis			3	3		0.021 days, 0.021 days, 0 days						3		JBI for case series	Moderate risk (7/9)
1642279	1992	Schrander-Stumpel, C.	MAD	Clinical diagnosis			1	0	16 years									JBI for case reports	Moderate risk (5/7)
2363426	1990	Van Hoestenberghe, M.	RD	Clinical diagnosis			1	1		0.33 years				1				JBI for case reports	Low risk (5/5)
2426945	1986	Witt, D.R	RD	Clinical diagnosis			2	2		0.5 days, 21 days				2				JBI for case series	Moderate risk (6/8)
3605203	1987	Gillerot, Y.	RD	Clinical diagnosis			1	1		0.021 days							1	JBI for case reports	Low risk (4/5)
3717214	1986	Tenconi, R.	MAD	Clinical diagnosis			3	1	60 years, 53 years	56 years	1							JBI for case series	Moderate Risk (4/9)
9217218	1997	Mau, U.	RD	Clinical diagnosis			1	1		16 days				1				JBI for case reports	Low risk (5/5)
10995511	2000	Tudisco, C.	MAD	Clinical diagnosis			1	0	33 years									JBI for case reports	Low risk (4/5)
17935239	2007	Kosho, T.	MAD-A	Genetic diagnosis	c.1585G>A (p.Ala529Thr)	LMNA	1	0	56 years									JBI for case reports	Low risk (5/5)
18348272	2008	Zirn, B.	MAD-A	Genetic diagnosis	c.1411C>T (p.Arg471Cys)	LMNA	1	0	7 years									JBI for case reports	Low risk (5/5)
19504603	2009	Chen, M.	RD ZMPSTE24	Genetic diagnosis	c.1085_1086insT (p.Leu362Phefs*19)	ZMPSTE24	1	1		0.125 days				1				JBI for case reports	Low risk (5/5)
19764019	2009	Garavelli, L.	MAD-A	Genetic diagnosis	c.1580G>A (p.Arg527His)	LMNA	2	0	5.25 years, 4.17 years									JBI for case series	Moderate risk (7/9)
19842191	2009	Madej-Pilarczyk, A.	RD LMNA	Genetic diagnosis	c.1303C>T (p.Arg435Cys)	LMNA	3	3		2.5 years, 2 years, 2.5 years				3				JBI for case series	Moderate risk (7/9)
20034068	2010	Li, C.	RD ZMPSTE24	Genetic diagnosis	c.1085dupT (p.Leu362Phefs*19)	ZMPSTE24	1	1		28 days							1	JBI for case reports	Low risk (5/5)
20101687	2010	Smigiel, R.	RD ZMPSTE24	Genetic diagnosis	(p.Lys17Serfs*21) , (p.Tyr195Phefs*22)	ZMPSTE24	2	2		7 days, 12 days				2				JBI for case series	Low risk (8/9)
20814950	2010	Ahmad, Z.	MAD-B	Genetic diagnosis	c.743C>T (p.Pro248Leu), c.1349G>A (p.Trp450Ter)	ZMPSTE24	2	0	4 years, 0.75 years									JBI for case series	Low risk (8/9)
27410998	2016	Haye, D.	MAD-B	Genetic diagnosis	c.1196A>G (p.Tyr399Cys)	ZMPSTE24	1	0	15 years									JBI for case reports	Low risk (5/5)
30919593	2019	Alarcón, P.I.	MAD-B	Genetic diagnosis	c.1085dup (p.Leu362Phefs*19), c.794A>G (p.Asn265Ser)	ZMPSTE24	1	0	15 years									JBI for case reports	Low risk (5/5)
32297714	2020	Guedenon, K.M.	HGPS	Genetic diagnosis	c.1824C>T (p.Gly608Gly)	LMNA	1	0	15 years									JBI for case reports	Low risk (5/5)
11321244	2001	Sergi, C.	RD	Clinical diagnosis			1	1		6 days				1				JBI for case reports	Low risk (5/5)
5648940	1968	Margolin, F.R.	HGPS	Clinical diagnosis			1	0	7.83 years									JBI for case reports	Low risk (7/8)
19625224	2009	Zambrano, R.M.	HGPS	Genetic diagnosis	c.1824C>T (p.Gly608Gly)	LMNA	1	0	2 years									JBI for case reports	Low risk (5/5)
12381448	2002	Rodrigues, G.H.P.	HGPS	Clinical diagnosis			1	0	8 years									JBI for case reports	Low risk (5/5)
32360386	2020	Musumeci, F.	HGPS	Clinical diagnosis			1	0	23.83 years									JBI for case reports	Moderate risk (5/8)
1739302	1992	Welsh, K.M.	RD	Clinical diagnosis			2	2		28 days, 42 days				2				JBI for case series	Moderate risk (5/9)
1739303	1992	Happle, R.	RD	Clinical diagnosis			2	2		4 days, 0.083 days				2				JBI for case series	Low risk (8/9)
15897383	2005	Armbrust, S.	RD	Clinical diagnosis			1	1		24 days					1			JBI for case reports	High risk (2/5)
22685055	2012	d'Erme, A.M.	HGPS	Genetic diagnosis	c.1824C>T (p.Gly608Gly)	LMNA	1	0	0.58 years									JBI for case reports	Moderate risk (3/5)
18470519	2008	Thill, M.	RD ZMPSTE24	Genetic diagnosis	c.1385T>G (p.Leu462Arg)	ZMPSTE24	1	1		0.14 days				1				JBI for case reports	Low risk (6/7)
21251803	2012	Doubaj, Y.	HGPS	Genetic diagnosis	c.1824C>T (p.Gly608Gly)	LMNA	1	0	5 years									JBI for case series	Moderate risk (5/9)
25286833	2014	Luo, D.-Q.	MAD-A	Genetic diagnosis	c.1579C>T (p.Arg527Cys)	LMNA	3	0	7 years, 3.25 years, 1.83 years									JBI for case series	Low risk (8/9)
35287606	2022	Gonzalez Maestro, V.	HGPS	Genetic diagnosis	c.1822G>A (p.Gly608Ser)	LMNA	1	0	5 years									JBI for case reports	Low risk (8/8)
37723091	2023	Sharma, A.	HGPS	Genetic diagnosis	c.1824C>T (p.Gly608Gly)	LMNA	1	0	0.17 years									JBI for case reports	Moderate risk (3/5)
20550970	2010	Cunningham, V.J.	MAD-B	Genetic diagnosis	c.794A>G (p.Asn256Ser), c.207_208delCT (p.Tyr70fs)	ZMPSTE24	1	0	16 years									JBI for case reports	Low risk (5/5)
7317281	1981	Zina, A.M.	MAD	Clinical diagnosis			4	0	46 years, 30 years, 37 years, 40 years									JBI for case series	Moderate risk (6/9)
17459035	2007	Mazereeuw-Hautier, J.	HGPS	Genetic diagnosis	c.1824C>T (p.Gly608Gly)	LMNA	3	0	3 years, 5 years, 7.25 years									JBI for case series	Low risk (8/8)
18671782	2008	Sander, C.S.	RD ZMPSTE24	Genetic diagnosis	c.627+1G>C	ZMPSTE24	2	2		45 days, 56 days				2				JBI for case series	Low risk (8/9)
23141186	2013	Narazaki, R.	HGPS	Genetic diagnosis	c.1824C>T (p.Gly608Gly)	LMNA	1	1		10 years			1					JBI for case reports	Low risk (8/8)
14515974	2003	Hou, J.-W.	RD	Clinical diagnosis			2	2		6 days, 8 days				2				JBI for case series	Moderate risk (6/9)
12541091	2003	Mandera, M.	HGPS	Clinical diagnosis			1	0	10 years old									JBI for case reports	Moderate risk (4/8)
26379196	2016	Matulevičienė, A.	RD ZMPSTE24	Genetic diagnosis	c.50delA (p.Lys17Serfs*21)	ZMPSTE24	2	2		16 days, 23 days				2				JBI for case series	Moderate risk (6/9)
27100822	2016	Ozer, L.	MAD-A	Genetic diagnosis	c.1586C>T (p.Ala529Val)	LMNA	2	0	59 years, 37 years									JBI for case series	Low risk (7/8)
36876346	2023	Ververi, A.	RD ZMPSTE24	Genetic diagnosis	c.1204–1G>A, c.1085dupT (p.Leu362Phefs*19)	ZMPSTE24	1	1		22 days				1				JBI for case reports	Low risk (5/5)
17459069	2007	Nakamura, S.	HGPS	Genetic diagnosis	c.1824C>T (p.Gly608Gly)	LMNA	1	1		19 years	1							JBI for case reports	Low risk (5/5)
6467666	1984	Pallotta, R.	MAD	Clinical diagnosis			2	0	23 years, 27 years									JBI for case series	Moderate risk (7/9)
8131298	1993	Dean, J.C.	RD	Clinical diagnosis			2	2		20 days, 3 days				2				JBI for case series	Moderate risk (6/8)
18435794	2008	Miyoshi, Y.	MAD-B	Genetic diagnosis	c.121C>T (p.Gln41Ter), c.743C>T (p.Pro248Leu)	ZMPSTE24	2	0	7.16 years, 3.42 years									JBI for case series	Low risk (7/8)
20662858	2010	Youn, G.J.	RD LMNA	Genetic diagnosis	c.1303C>T (p.Arg435Cys)	LMNA	1	1		0.58 years				1				JBI for case reports	Low risk (5/5)
21108632	2012	Ahmad, Z.	RD ZMPSTE24	Genetic diagnosis	c.1085dupT (p.Leu362Phefs*19), c.1020G>A (p.Trp340Ter)	ZMPSTE24	2	2		16 days, 6 days							2	JBI for case series	Moderate risk (6/9)
27267192	2016	Carvalho, V.O.	HGPS	Genetic diagnosis	c.1824C>T (p.Gly608Gly)	LMNA	1	0	6.92 years									JBI for case reports	Low risk (7/8)
8193408	1994	Erdem, N.	HGPS	Clinical diagnosis			1	0	0.83 years									JBI for case reports	Low risk (5/5)
21267004	2011	Ben Yaou, R.	MAD-B	Genetic diagnosis	c.281T>C (p.Leu94Pro)	ZMPSTE24	1	1		30 years						1		JBI for case reports	Low risk (8/8)
22549407	2012	Al-Haggar, M.	MAD-A	Genetic diagnosis	c.1580G>T (p.Arg527Leu)	LMNA	3	0	4 years, 10 years, 4 years									JBI for case series	Low risk (8/9)
33422685	2021	Sakka, R.	MAD-A	Genetic diagnosis	c.1580G>A (p.Arg527His)	LMNA	5	0	14 years, 12 years, 4.5 years, 9 years, 48 years									JBI for case series	Low risk (8/9)
8444237	1993	Hoffmann, R.	RD	Clinical diagnosis			2	2		5 days, 0,17 years				2				JBI for case series	Moderate risk (7/9)
15726408	2005	Sevenants, L.	HGPS	Genetic diagnosis	c.1824C>T (p.Gly608Gly)	LMNA	1	0	2 years									JBI for case reports	Low risk (5/5)
19020898	2009	Morais, P.	RD ZMPSTE24	Genetic diagnosis	c.1085_1086insT (p.Leu362Phefs*19)	ZMPSTE24	1	1		9 days				1				JBI for case reports	Low risk (8/8)
34680903	2021	Jerú, I.	MAD-A	Genetic diagnosis	c.1580G>A (p.Arg527His) c.1580G>T (p.Arg527Leu)	LMNA	3	0	27 years, 5 years, 2 years									JBI for case series	Moderate risk (6/9)
16440877	2005	Afifi, H.H	MAD	Clinical diagnosis			2	0	5 years, 17 years									JBI for case series	Low risk (6/7)
12913070	2003	Agarwal, A.K.	MAD-B	Genetic diagnosis	c.1018T>C (p.Trp340Arg)	ZMPSTE24	1	1		24 years old						1		JBI for case reports	Low risk (8/8)
20827016	2010	Agarwal, U.S.	HGPS	Clinical diagnosis			1	0	4 years									JBI for case reports	High risk (3/7))
22011502	2011	Chandravanshi, S.L.	HGPS	Clinical diagnosis			1	1		16.5 years	1							JBI for case reports	Low risk (5/5)
19383993	2009	Jagadeesh, S.	RD ZMPSTE24	Genetic diagnosis	c.691G>T (p.Glu231Ter)	ZMPSTE24	1	1		2 days				1				JBI for case series	High risk (2/9)
19383993	2009	Jagadeesh, S.	RD	Clinical diagnosis			1	1		0 days							1	JBI for case series	High risk (2/9)
12522278	2002	Mahadevan R.	RD	Clinical diagnosis			1	1		10 days				1				JBI for case reports	Low risk (4/5)
15311567	2004	Cefle, A.	MAD	Clinical diagnosis			1	0	9 years									JBI for case reports	Low risk (4/5)
9732012	1998	Prasad, P.V.	MAD	Clinical diagnosis			4	0	9 years, 6 years, 3 years,15 years									JBI for case series	High risk (2/9)
34830197	2021	Suh, M.R.	HGPS	Genetic diagnosis	c.1824C>T (p.Gly608Gly)	LMNA	1	0	12.58 years									JBI for case reports	Low risk (8/8)
12452985	2002	Batstone, M.D.	HGPS	Clinical diagnosis			1	0	12.5 years									JBI for case reports	Low risk (8/8)
7593806	1995	Fryburg, J.S	MAD	Clinical diagnosis			2	0	37 years, 26 years									JBI for case series	High risk (4/9)
24034385	2013	Zhang, H.	HGPS	Genetic diagnosis	c.1824C>T (p.Gly608Gly)	LMNA	1	0	0.67 years									JBI for case reports	Low risk (4/5)
659773	1978	Tokunaga, M.	HGPS	Clinical diagnosis			1	0	9 years									JBI for case reports	Low risk (5/5)
15998779	2005	Garg, A.	MAD-A	Genetic diagnosis	c.1586C>T (p.Ala529Val)	LMNA	2	0	18 years, 21 years									JBI for case series	Low risk (7/7)
17848409	2007	Lombardi, F.	MAD-A	Genetic diagnosis	c.1318G>A (p.Val440Met) , c.1580G>A (p.Arg527His)	LMNA	1	0	27 years									JBI for case reports	Low risk (5/5))
18796515	2008	Agarwal, A.K.	MAD-A	Genetic diagnosis	c.1579C>T (p.Arg527Cys)	LMNA	1	0	7 years									JBI for case reports	Low risk (5/5))
11426829	2001	Wesche, W.A.	RD	Clinical diagnosis			1	1		2.71 days							1	JBI for case reports	Low risk (5/5)
10380434	1999	Sivaraman	HGPS	Clinical diagnosis			1	0	4.58 years									JBI for case reports	High risk (2/5)
30461078	2019	Diociaiuti, A.	RD ZMPSTE24	Genetic diagnosis	c.1085dupT (p.Leu362Phefs*19)	ZMPSTE24	1	1	25 days					1				JBI for case reports	Low risk (5/5)
33590899	2021	Wang, S.	HGPS	Genetic diagnosis	c.1824C>T (p.Gly608Gly)	LMNA	7	0	15 years, 3 years, 4 years, 2 years, 0.92 years, 6 years, 6 years									JBI for case series	Moderate risk (7/9)
12768443	2003	Cao, H.	HGPS	Genetic diagnosis	c.1822G>A (p.Gly608Ser), 1824C>T (p.Gly608Gly)	LMNA	6	0	10 years, 10 years, 13 years, 5 years, 9 years, 6 years									JBI for case series	Moderate risk (7/9)
12768443	2003	Cao, H.	MAD-A	Genetic diagnosis	p.[Arg471Cys];[Arg527Cys]	LMNA	1	0	28 years									JBI for case series	Moderate risk (7/9)
28878338	2017	Sato-Kawano, N.	HGPS	Genetic diagnosis	c.1824C>T (p.Gly608Gly)	LMNA	7	2	5 years, 15 years, 4 years, 6 years, 8 years	10 years, 15 years		1				1		JBI for case series	Low risk (9/9)
17152860	2006	Agarwal, A.K.	MAD-B	Genetic diagnosis	c.1085insT (p.Leu362Phefs*19), c.794A>G (p.Asn265Ser)	ZMPSTE24	1	1	37 years							1		JBI for case reports	Low risk (8/8)
22148005	2011	Kim , H.K.	HGPS	Genetic diagnosis	c.1824C>T (p.Gly608Gly)	LMNA	1	0	4 years									JBI for case reports	Low risk (5/5)
10087745	1999	Wisuthsarewong, W.	HGPS	Clinical diagnosis			1	0	3 years									JBI for case reports	Low risk (8/8)
284134	1978	King, C.R.	HGPS	Clinical diagnosis			1	1		14.33 years				1				JBI for case reports	Low risk (8/8)
2352259	1990	Mok, Q.	RD	Clinical diagnosis			3	3		7 days, 0.021 days, 49 days							3	JBI for case series	Moderate risk (6/9)
14627682	2003	Shen, J.J.	MAD-A	Genetic diagnosis	c.1580G>A (p.Arg527His)	LMNA	1	0	12 years									JBI for case reports	Low risk (5/5)
2957478	1987	Dyck, J.D.	HGPS	Clinical diagnosis			1	0	14 years									JBI for case reports	Moderate risk (6/8)
4552697	1972	DeBusk, F.L.	HGPS	Clinical diagnosis			4	1	4.5 years, 14.5 years, 8.5 years	7 years							1	JBI for case series	Moderate risk (6/9)
17642424	2007	Sadeghi-Nejad, A.	HGPS	Genetic diagnosis	c.1822G>A (p.Gly608Ser)	LMNA	1	1		3.5 years						1		JBI for case reports	Low risk (8/8)
19373113	2009	Yandow, S.M.	HGPS	Clinical diagnosis			1	0	8.33 years									JBI for case reports	Moderate risk (6/8)
22433957	2012	Akhbari, P.	HGPS	Clinical diagnosis			2	1	13 years	11 years	1							JBI for case series	Moderate risk (5/9)
19474589	2009	Bosque, E.	RD-LMNA	Genetic diagnosis	c.1821G>A (p.Val607Val)	LMNA	1	1		35 days				1				JBI for case reports	Low risk (4/5)
8182686	1994	Stables, G.I.	HGPS	Clinical diagnosis			1	0	1.5 years									JBI for case reports	Low risk (4/5)
29710166	2018	Gordon, L.B.	HGPS	Genetic diagnosis	c.1824C>T (p.Gly608Gly)	LMNA	258	124	14.5 years	14.5 years	55	2	8			4	55	NOS (Newcastle–Ottawa)	Low 9/9
25629449	2015	Kwan, J.M.	MAD-B	Genetic diagnosis	(p.Asn265Ser), (p.Leu362Phefs*19)	ZMPSTE24	1	0	1.25 years									JBI for case reports	Low risk (5/5)
24793088	2014	Slimani, S.	MAD	Clinical diagnosis			1	0	14 years									JBI for case reports	High risk (1/5)
24123119	2014	Hallock, G.G.	MAD	Clinical diagnosis			1	0	38 years									JBI for case reports	Moderate risk (5/8)
20150858	2010	Russo-Menna, I.	HGPS	Clinical diagnosis			1	0	4 years									JBI for case reports	Low risk (7/8)
32799251	2020	Suwal, R.	HGPS	Clinical diagnosis			1	0	5 years									JBI for case reports	Low Risk (4/5)
10591957	1999	Gross, C.	RD	Clinical diagnosis			1	1		20 days				1				JBI for case reports	Low risk (5/5))
20401475	2010	Salamat, M.	HGPS	Clinical diagnosis			1	0	18 years									JBI for case reports	High risk (2/6)
1745628	1991	Gillar, P.J.	HGPS	Clinical diagnosis			1	0	1.8 years									JBI for case reports	Low risk (5/5)
10337683	1999	Graham, J.	RD	Clinical diagnosis			1	1		1.1 days				1				JBI for case reports	Low risk (5/5))
10990576	2000	Jansen, T.	HGPS	Clinical diagnosis			1	0	1.5 years									JBI for case reports	Low risk (5/5)
11860576	2002	Nijsten, T.E.C	RD	Clinical diagnosis			1	1		13 days				1				JBI for case reports	Low risk (8/8)
21121943	2011	Yesil, G.	RD-ZMPSTE24	Genetic diagnosis	c.1085_1086insT (p.Leu362Phefs*19)	ZMPSTE24	1	1		14 days				1				JBI for case reports	Low risk (8/8)
25556323	2015	Chu, Y.	HGPS	Genetic diagnosis	c.1824C>T (p.Gly608Gly)	LMNA	1	0	6 years									JBI for case reports	Low risk (5/5)
34647350	2021	Scott, J.B	RD-ZMPSTE24	Genetic diagnosis	c.50delA (p.Lys17Serfs*21), c.1085dup (p.Leu362Phefs*19), c.1085dupT (p.Leu362Phefs*19) / c.1097T>G (p.Leu366Arg)	ZMPSTE24	3	3		22 days, 5 days, 17 days				3				JBI for case series	Moderate risk (5/9)
38965877	2024	Grist, J.	RD-ZMPSTE24	Genetic diagnosis	c.1085dupT (p.Leu362PhefsTer19)	ZMPSTE24	1	1		9 days				1				JBI for case reports	Low risk (8/8)
22746836	2012	Kim, J.-Y.	RD-ZMPSTE24	Genetic diagnosis	c.121C>T (p.Gln41Ter), c.1393A>G (p.Arg465Gly)	ZMPSTE24	1	1		44 days				1				JBI for case reports	Low risk (7/8)
23597553	2013	Lu, C.-S.	RD	Clinical diagnosis			1	1		0 days							1	JBI for case series	Moderate risk (7/9)
23597553	2013	Lu, C.-S.	RD ZMPSTE24	Genetic diagnosis	c.715G>T (p.Glu239Ter)	ZMPSTE24	1	1		16 days				1				JBI for case series	Moderate risk (7/9)
11842974	2002	Ackerman, J.	HGPS	Clinical diagnosis			1	1		20 years			1					JBI for case reports	Low risk (5/5)
8152880	1993	Reed, M.H.	RD	Clinical diagnosis			1	1		1.31 days						1		JBI for case reports	Low risk (5/5)
11494296	2001	Mulder, E.J.	RD	Clinical diagnosis			3	3		2 days, 0.29 days, 0.042 days				2			1	JBI for case series	Moderate risk (7/9)
17286315	2007	Kim, Y.N.	RD	Clinical diagnosis			2	2		0.021 days, 5 days				2				JBI for case series	Low risk (8/9)
17511383	2007	Mutesa, L.	HGPS	Genetic diagnosis	c.1824C>T (p.Gly608Gly)	LMNA	1	0	12 years									JBI for case reports	Low risk (5/5)
38808865	2024	Carvalho, A.A.	MAD-A	Genetic diagnosis	c.1579C>T (p.Arg527Cys)	LMNA	1	0	6 years									JBI for case reports	Low risk (5/5)
11201039	2000	Hoeffel, J.C.	MAD	Clinical diagnosis			1	0	7 years									JBI for case reports	Low risk (5/5)
28540519	2017	Chawla, G.S.	HGPS	Clinical diagnosis			1	0	8 years									JBI for case reports	Moderate risk (3/5)
31786425	2019	Buyse, B.	HGPS	Clinical diagnosis			1	0	19 years									JBI for case reports	Low risk (7/8)
663743	1978	Runge, P.	HGPS	Clinical diagnosis			1	1		0.67 years							1	JBI for case reports	Low risk (5/6)
19102058	2008	Chiang , M.-C.	RD	Clinical diagnosis			1	1		75 days				1				JBI for case reports	Low risk (8/8)
9286026	1997	van der Stege, J.G.	RD	Clinical diagnosis			1	1		0.021 days				1				JBI for case reports	Low risk (8/8)
18844329	2008	Feldman-Leidner, N.	RD	Clinical diagnosis			1	1		0,021 days							1	JBI for case reports	Low risk (5/5)
31014187	2020	Soares Cerejo, R.P.	HGPS	Clinical diagnosis			1	1		14 years	1							JBI for case reports	Low risk (7/8)
36927562	2022	Wu, D.-D.	MAD-B	Genetic diagnosis	c.743C>T (p.Pro248Leu)	ZMPSTE24	1	0	2 years									JBI for case reports	Low risk (5/5)
8128740	1993	Ha, J.W.	HGPS	Clinical diagnosis			1	1		24 years	1							JBI for case reports	Low risk (4/5)
CITATIONS
10722246	1999	Stehbens, W.E.	HGPS	Clinical diagnosis			1	1		20 years			1					JBI for case reports	Moderate risk (4/6)
4447659	1974	Gilkes, J.J	HGPS	Clinical diagnosis			1	1		13 years							1	JBI for case series	Low risk (8/9)
5506943	1970	Macnamara, B.G.	HGPS	Clinical diagnosis			1	1		10.75 years	1							JBI for case reports	Low risk (5/5)
13165959	1954	Atkins, L.	HGPS	Clinical diagnosis			1	1		11.25 years	1							JBI for case reports	Low risk (5/5)
10.1001/archpedi.1945.02020170002001	1945	Nathan, B.	HGPS	Clinical diagnosis			1	1		7.5 years	1							JBI for case reports	Low risk (5/5)
21976890	2011	Hanumanthappa, N.B.	HGPS	Clinical diagnosis			1	0	12 years									JBI for case reports	Low risk (5/5)
36523395	2022	Wang, J.	HGPS	Genetic diagnosis	c.1824C>T (p.Gly608Gly)	LMNA	2	0	4 years,8.5 years									JBI for case series	Low risk (8/9)
18256394	2008	Merideth, M.A.	HGPS	Genetic diagnosis	c.1824C>T (p.Gly608Gly)	LMNA	14	2	1.5, years, 1.75 years, 2.1 years, 2.25 years, 4.67 years, 5.0 years, 6.83 years, 6.92 years, 8.42 years, 8.42 years, 8.58 years, 10.17 years	13.42 years, 17.92 years	2							JBI for case series	Low risk (9/9)
6859116	1983	Toriello, H.V.	RD	Clinical diagnosis			2	2		3 days, 6 days				2				JBI for case series	Moderate risk (5/9)
3740097	1986	Toriello, H.V.	RD	Clinical diagnosis			1	1		0.042 days				1				JBI for case reports	Low risk (5/5)
3840649	1985	Lowry, R.B.	RD	Clinical diagnosis			4	4		0.0021 days, 4 days, 1 day, 0.021 days				4				JBI for case series	Low risk (8/9)
8911903	1996	Das-Kundu, S.	RD	Clinical diagnosis			1	1		35 days				1				JBI for case reports	Low risk (5/5)
10.1016/j.dsi.2015.10.003	2016	Chang Liao, N.-F.	RD-ZMPSTE24	Genetic diagnosis	c.715G>T (p.Glu239Ter)	ZMPSTE24	1	1		0.25 years				1				JBI for case reports	Low risk (5/5)
1476923	1992	Paige, D.G.	RD	Clinical diagnosis			1	1		21 days				1				JBI for case reports	Low risk (5/5)
36386051	2022	Ng, W.D.	RD-ZMPSTE24	Genetic diagnosis	c.1085dupT (p.Leu362Phefs*19), c.1059+1G>T	ZMPSTE24	1	1		11 days				1				JBI for case reports	Low risk (8/8)
12788894	2003	Simha, V.	MAD-A	Genetic diagnosis	c.1580G>A (p.Arg527His)	LMNA	3	0	20 years, 16 years, 12 years									JBI for case series	Moderate risk (6/9)
15937076	2005	Shackleton, S.	MAD-B	Genetic diagnosis	c.1085_1086insT (p.Leu362Phefs*19), c.794A>G (p.Asn265Ser)	ZMPSTE24	1	1		2.75 years				1				JBI for case reports	Low risk (4/5)
6237548	1984	Shozawa, T.	HGPS	Clinical diagnosis			1	1		11.5 years	1							JBI for case reports	Low risk (6/7)
13139804	1960	Gabr, M.	HGPS	Clinical diagnosis			1	1		9 years						1		JBI for case reports	Low risk (7/8)
1262674	1976	Ishii, T.	HGPS	Clinical diagnosis			1	1		20 years						1		JBI for case reports	Low risk (7/8)
14468738	1962	Makous, N.	HGPS	Clinical diagnosis			1	1		12.6 years	1							JBI for case reports	Low risk (8/8)
15418991	1950	Manschot, W.A.	HGPS	Clinical diagnosis			1	1		27.5 years	1							JBI for case reports	Low risk (6/7)
5415913	1970	Reichel, W.	HGPS	Clinical diagnosis			2	2		17 years, 11.6 years	2							JBI for case series	Moderate risk (6/9)
10.1001/archpedi.1945.02020170002001	1945	Talbot, N.B.	HGPS	Clinical diagnosis			1	1		7.6 years	1							JBI for case reports	Low risk (7/8)
20949529	2010	Guglielmi, V.	MAD-A	Genetic diagnosis	c.1580G>A (p.Arg527His)	LMNA	1	0	43 years									JBI for case reports	Low risk (5/5)
CASOS PROPIOS
CR-01			HGPS	c.1822G>A, p.(G608S)			1	1		7 years			1
CR-02			HGPS	c.1824C>T, p.(G608G)			1	1		16 years	1
TOTAL							552	265			77	3	13	78	1	16	77
