# Supplementary material
Source: publisher site journal article supplement (doi:10.18632/aging.206389)
Supplement: Supplementary file 3 [file aging-v18i1-206389-supplementary-material-SD10.pdf]

## SUPPLEMENTARY TABLES

**Supplementary Table 1. PICOS eligibility criteria.**

|                                   |                                                                                                                                                                                                                                                                                                                                                                                                                                                                                                                                                                                          |
|-----------------------------------|------------------------------------------------------------------------------------------------------------------------------------------------------------------------------------------------------------------------------------------------------------------------------------------------------------------------------------------------------------------------------------------------------------------------------------------------------------------------------------------------------------------------------------------------------------------------------------------|
| <b>Population</b>                 | Patients of any age and sex with classic laminopathic progeria: <ul style="list-style-type: none"> <li>• Hutchinson-Gilford: LMNA c.1824C&gt;T [p.G608G] and c.1822G&gt;A [p.G608S])</li> <li>• Mandibuloacral dysplasia type A: LMNA (p.R527H and others)</li> <li>• Mandibuloacral dysplasia type B: ZMPSTE24</li> <li>• Restrictive dermopathy: ZMPSTE24 or LMNA</li> </ul>                                                                                                                                                                                                           |
| <b>Intervention/<br/>Exposure</b> | <b>Diagnosis of a classical laminopathic progeroid syndrome</b> (Hutchinson-Gilford progeria, mandibuloacral dysplasia type A/B, or restrictive dermopathy), established <b>either</b><br>a) by pathogenic mutation in <i>LMNA</i> or <i>ZMPSTE24</i> confirmed by Sanger, targeted NGS panel, exome, or equivalent method, <b>or</b><br>b) by clinical criteria clearly described by the authors                                                                                                                                                                                        |
| <b>Comparison</b>                 | 1. Diagnostic method: genetically confirmed vs clinically diagnosed cases (within the same subtype when possible)<br>2. Between subtypes: HGPS vs MAD-A vs MAD-B vs RD                                                                                                                                                                                                                                                                                                                                                                                                                   |
| <b>Outcomes</b>                   | <b>Primary objectives</b><br>1. Estimate pooled life expectancy in classical laminopathic progeroid syndromes.<br>2. Describe the overall distribution of causes of death (cardiovascular failure, ischemic stroke, trauma or accident, respiratory failure, sepsis, other and N.A. -unknown-).<br><b>Secondary objectives</b><br>3. Compare life expectancy and causes of death between genetically confirmed cases with clinically diagnosed cases.<br>4. Compare the same outcomes across sub-types.<br>5. Add two genetically confirmed cases from our centre to the pooled dataset. |
| <b>Design</b>                     | <ul style="list-style-type: none"> <li>• Case reports and case series (<math>\geq 1</math> patient) with extractable data: vital status, age at death or last known age (if alive), and cause of death (if deceased).</li> <li>• Clinical / observational / comparative studies.</li> <li>• Retrospective or prospective cohorts.</li> </ul>                                                                                                                                                                                                                                             |

**Supplementary Table 2. Cumulative incidence of cardiovascular and respiratory death at 1, 5, 10 and 20 years in classical laminopathic progeroid syndromes (competing-risks analysis).**

| Subtype     | Time since birth (years) | CV death CIF (%) | RESP death CIF (%) |
|-------------|--------------------------|------------------|--------------------|
| HGPS        | 1                        | 0.0              | 0.0                |
| HGPS        | 5                        | 0.0              | 0.0                |
| HGPS        | 10                       | 4.8              | 0.0                |
| HGPS        | 20                       | 46.0             | 0.0                |
| RD-LMNA     | 1                        | 0.0              | 56.2               |
| RD-LMNA     | 5                        | 0.0              | 100.0              |
| RD-LMNA     | 10                       | 0.0              | 100.0              |
| RD-LMNA     | 20                       | 0.0              | 100.0              |
| RD-ZMPSTE24 | 1                        | 0.0              | 76.3               |
| RD-ZMPSTE24 | 5                        | 0.0              | 76.3               |
| RD-ZMPSTE24 | 10                       | 0.0              | 76.3               |
| RD-ZMPSTE24 | 20                       | 0.0              | 76.3               |

CV, cardiovascular death; RESP, respiratory death; CIF, cumulative incidence function. Estimates obtained from a competing-risks model. No Fine-Gray subdistribution hazard ratios are reported because of the limited number of cause-specific events in several strata.

**Supplementary Table 3. Number of included patients and deaths by subtype in the primary and sensitivity analyses.**

**(A) Overall number of patients and deaths by scenario.**

| scenario             | N_rows | N_unique_patients | Deaths |
|----------------------|--------|-------------------|--------|
| ALL_rows_input       | 294    | 294               | 141    |
| Aggregated_raw       | 0      | 0                 | 0      |
| IPD_all              | 294    | 294               | 141    |
| primary              | 158    | 158               | 61     |
| S1_includingClinical | 294    | 294               | 141    |
| S2_noHighROB         | 154    | 154               | 57     |
| S3_noOwn             | 156    | 156               | 59     |
| S3_onlyOwn           | 2      | 2                 | 2      |

**(B) Distribution of patients by laminopathic subtype in each scenario.**

| scenario             | HGPS_N | MAD-A_N | MAD-B_N | RD-LMNA_N | RD-ZMPSTE24_N | ATYPICAL_N | MAD-clin_N | RD-clin_N |
|----------------------|--------|---------|---------|-----------|---------------|------------|------------|-----------|
| ALL_rows_input       | 115    | 31      | 21      | 8         | 38            | 0          | 26         | 55        |
| Aggregated_raw       |        |         |         |           |               |            |            |           |
| IPD_all              | 115    | 31      | 21      | 8         | 38            | 0          | 26         | 55        |
| primary              | 60     | 31      | 21      | 8         | 38            | 0          | 0          | 0         |
| S1_includingClinical | 115    | 31      | 21      | 8         | 38            | 0          | 26         | 55        |
| S2_noHighROB         | 60     | 31      | 21      | 8         | 34            | 0          | 0          | 0         |
| S3_noOwn             | 58     | 31      | 21      | 8         | 38            | 0          | 0          | 0         |
| S3_onlyOwn           | 2      | 0       | 0       | 0         | 0             | 0          | 0          | 0         |

Primary = genetically confirmed individual patient data (IPD) only.

S1 (*including clinical diagnoses*) = primary IPD plus patients diagnosed on clinical/phenotypic grounds without molecular confirmation.

S2 (*no high risk of bias*) = primary IPD excluding studies judged at high risk of bias in the IPD risk-of-bias assessment.

S3 (*no own centre*) = primary IPD excluding cases from our own centre; S3-onlyOwn = IPD from our own centre only (exploratory).

Full definitions of each scenario are provided in Supplementary File 1.

**Supplementary Table 4. Pairwise log-rank and Tarone–Ware tests between laminopathic progeroid subtypes (genetically confirmed IPD cohort).**

| Subtype_A | Subtype_B   | p_raw    | p_tarone_ware | p_Holm   |
|-----------|-------------|----------|---------------|----------|
| HGPS      | MAD-A       | 9,5E-06  | 0,000148      | 2,85E-05 |
| HGPS      | MAD-B       | 0,000848 | 0,017876      | 0,001695 |
| HGPS      | RD-LMNA     | 1,5E-22  | 1,08E-21      | 1,35E-21 |
| HGPS      | RD-ZMPSTE24 | 4,34E-31 | 5,97E-29      | 4,34E-30 |
| MAD-A     | MAD-B       | 0,00243  | 0,008654      | 0,00243  |
| MAD-A     | RD-LMNA     | 3,76E-13 | 9,39E-13      | 2,26E-12 |
| MAD-A     | RD-ZMPSTE24 | 2,13E-18 | 1,43E-16      | 1,7E-17  |
| MAD-B     | RD-LMNA     | 2,82E-09 | 7,24E-09      | 1,41E-08 |
| MAD-B     | RD-ZMPSTE24 | 9,56E-14 | 4E-12         | 6,7E-13  |
| RD-LMNA   | RD-ZMPSTE24 | 3,23E-06 | 2,39E-05      | 1,29E-05 |

Pairwise comparisons of overall survival between genetically confirmed IPD subtypes using Kaplan–Meier curves.

*p\_raw*: two-sided log-rank p-value.

*p\_Tarone–Ware*: two-sided Tarone–Ware test p-value.

*p\_Holm*: Holm–Bonferroni–adjusted p-value for 10 pairwise comparisons.
