# Supplementary material
Source: publisher site journal article supplement (doi:10.18632/aging.206389)
Supplement: Supplementary file 4 [file aging-v18i1-206389-supplementary-material-SD6.xlsx]

## Sheet: Hoja1
PMIDS	REVIEWER 1	REVIEWER 2	FINAL DECISION	REASON FOR EXCLUSION
37270786	EXCLUDED	EXCLUDED	EXCLUDED	No age of the patient, age-at-death or cause-of-death data in the full text
37276254	EXCLUDED	EXCLUDED	EXCLUDED	No age of the patient, age-at-death or cause-of-death data in the full text
36919608	EXCLUDED	EXCLUDED	EXCLUDED	No age of the patient, age-at-death or cause-of-death data in the full text
35491649	INCLUDED	INCLUDED	INCLUDED
38191824	EXCLUDED	EXCLUDED	EXCLUDED	No age of the patient, age-at-death or cause-of-death data in the full text
38293952	EXCLUDED	EXCLUDED	EXCLUDED	No age of the patient, age-at-death or cause-of-death data in the full text
40802724	INCLUDED	INCLUDED	INCLUDED
31856865	INCLUDED	INCLUDED	INCLUDED
32119840	EXCLUDED	EXCLUDED	EXCLUDED	No age of the patient, age-at-death or cause-of-death data in the full text
27567006	INCLUDED	INCLUDED	INCLUDED
29377371	INCLUDED	INCLUDED	INCLUDED
25260550	INCLUDED	INCLUDED	INCLUDED
29466548	EXCLUDED	EXCLUDED	EXCLUDED	No age of the patient, age-at-death or cause-of-death data in the full text
30046820	EXCLUDED	EXCLUDED	EXCLUDED	No age of the patient, age-at-death or cause-of-death data in the full text
23775434	EXCLUDED	EXCLUDED	EXCLUDED	Duplicate cohort/patients already included in a more complete primary paper
23179651	EXCLUDED	EXCLUDED	EXCLUDED	No age of the patient, age-at-death or cause-of-death data in the full text
22495976	INCLUDED	INCLUDED	INCLUDED
22154431	EXCLUDED	EXCLUDED	EXCLUDED	Studies that discuss other topics
24169522	EXCLUDED	EXCLUDED	EXCLUDED	No age of the patient, age-at-death or cause-of-death data in the full text
24795390	INCLUDED	EXCLUDED	EXCLUDED	Duplicate cohort/patients already included in a more complete primary paper
20798379	INCLUDED	INCLUDED	INCLUDED
15317753	INCLUDED	INCLUDED	INCLUDED
12056972	EXCLUDED	INCLUDED	INCLUDED
16297189	EXCLUDED	INCLUDED	EXCLUDED	No age of the patient, age-at-death or cause-of-death data in the full text
15843403	EXCLUDED	EXCLUDED	EXCLUDED	No age of the patient, age-at-death or cause-of-death data in the full text
2434579	EXCLUDED	EXCLUDED	EXCLUDED	Full text not available
11149127	INCLUDED	INCLUDED	INCLUDED
9606327	EXCLUDED	INCLUDED	EXCLUDED	No age of the patient, age-at-death or cause-of-death data in the full text
319005	INCLUDED	INCLUDED	INCLUDED
https://www.scopus.com/inward/record.uri?eid=2-s2.0-0032732119&partnerID=40&md5=748d996e4daa7fb32bdc731dc30e9bb9	EXCLUDED	EXCLUDED	EXCLUDED	Full text not available
39177382	EXCLUDED	EXCLUDED	EXCLUDED	Full text not available
29774364	INCLUDED	INCLUDED	INCLUDED
22837124	INCLUDED	INCLUDED	INCLUDED
2012735	EXCLUDED	EXCLUDED	EXCLUDED	No clear clinical or genetic diagnosis.
23804595	INCLUDED	INCLUDED	INCLUDED
8456725	INCLUDED	INCLUDED	INCLUDED
33414362	INCLUDED	INCLUDED	INCLUDED
1736653	INCLUDED	INCLUDED	INCLUDED
12075506	EXCLUDED	EXCLUDED	EXCLUDED	No age of the patient, age-at-death or cause-of-death data in the full text
3728539	EXCLUDED	EXCLUDED	EXCLUDED	No clear clinical or genetic diagnosis.
1481855	INCLUDED	INCLUDED	INCLUDED
1605246	INCLUDED	INCLUDED	INCLUDED
1642279	INCLUDED	INCLUDED	INCLUDED
2363426	INCLUDED	INCLUDED	INCLUDED
2389799	EXCLUDED	EXCLUDED	EXCLUDED	No clear clinical or genetic diagnosis.
2426945	INCLUDED	INCLUDED	INCLUDED
3228132	EXCLUDED	EXCLUDED	EXCLUDED	No clear clinical or genetic diagnosis.
3605203	INCLUDED	INCLUDED	INCLUDED
3717214	INCLUDED	INCLUDED	INCLUDED
8291564	EXCLUDED	EXCLUDED	EXCLUDED	No age of the patient, age-at-death or cause-of-death data in the full text
8957511	EXCLUDED	EXCLUDED	EXCLUDED	Studies that discuss other topics.
9217218	INCLUDED	INCLUDED	INCLUDED
10215548	EXCLUDED	EXCLUDED	EXCLUDED	Studies that discuss other topics.
10995511	INCLUDED	INCLUDED	INCLUDED
12784312	EXCLUDED	EXCLUDED	EXCLUDED	No clear clinical or genetic diagnosis.
16838330	EXCLUDED	EXCLUDED	EXCLUDED	No age of the patient, age-at-death or cause-of-death data in the full text
17618517	EXCLUDED	EXCLUDED	EXCLUDED	Studies that discuss other topics.
17935239	INCLUDED	INCLUDED	INCLUDED
18348272	INCLUDED	INCLUDED	INCLUDED
19504603	INCLUDED	INCLUDED	INCLUDED
19764019	INCLUDED	INCLUDED	INCLUDED
19842191	INCLUDED	INCLUDED	INCLUDED
20034068	INCLUDED	INCLUDED	INCLUDED
20101687	INCLUDED	INCLUDED	INCLUDED
20814950	INCLUDED	INCLUDED	INCLUDED
20949529	EXCLUDED	EXCLUDED	EXCLUDED	Duplicate cohort/patients already included in a more complete primary paper
27410998	INCLUDED	INCLUDED	INCLUDED
29341437	EXCLUDED	EXCLUDED	EXCLUDED	Studies that discuss other topics.
30919593	INCLUDED	INCLUDED	INCLUDED
32297714	INCLUDED	INCLUDED	INCLUDED
2735343	EXCLUDED	EXCLUDED	EXCLUDED	No clear clinical or genetic diagnosis.
11321244	INCLUDED	INCLUDED	INCLUDED
5648940	INCLUDED	INCLUDED	INCLUDED
21437546	EXCLUDED	EXCLUDED	EXCLUDED	No clear clinical or genetic diagnosis.
19625224	INCLUDED	INCLUDED	INCLUDED
3579140	EXCLUDED	EXCLUDED	EXCLUDED	Full text not available
12381448	INCLUDED	INCLUDED	INCLUDED
10615539	EXCLUDED	EXCLUDED	EXCLUDED	Full text not available
32360386	INCLUDED	INCLUDED	INCLUDED
1739302	INCLUDED	INCLUDED	INCLUDED
1739303	INCLUDED	INCLUDED	INCLUDED
15897383	INCLUDED	INCLUDED	INCLUDED
22685055	INCLUDED	INCLUDED	INCLUDED
18470519	INCLUDED	INCLUDED	INCLUDED
21251803	INCLUDED	INCLUDED	INCLUDED
39988546	EXCLUDED	EXCLUDED	EXCLUDED	Studies that discuss other topics
25286833	INCLUDED	INCLUDED	INCLUDED
35287606	INCLUDED	EXCLUDED	EXCLUDED	Studies that discuss other topics
37723091	INCLUDED	INCLUDED	INCLUDED
38719254	EXCLUDED	EXCLUDED	EXCLUDED	Full text not available
39289035	EXCLUDED	EXCLUDED	EXCLUDED	Full text not available
20550970	INCLUDED	INCLUDED	INCLUDED
7317281	EXCLUDED	INCLUDED	INCLUDED
17459035	INCLUDED	INCLUDED	INCLUDED
18671782	INCLUDED	INCLUDED	INCLUDED
23141186	INCLUDED	INCLUDED	INCLUDED
14515974	INCLUDED	INCLUDED	INCLUDED
12541091	INCLUDED	INCLUDED	INCLUDED
39961814	EXCLUDED	EXCLUDED	EXCLUDED	Studies that discuss other topics.
26379196	INCLUDED	INCLUDED	INCLUDED
27100822	INCLUDED	INCLUDED	INCLUDED
33038109	EXCLUDED	EXCLUDED	EXCLUDED	Full text not available
36876346	INCLUDED	INCLUDED	INCLUDED
17459069	INCLUDED	INCLUDED	INCLUDED
2721021	EXCLUDED	EXCLUDED	EXCLUDED	No clear clinical or genetic diagnosis.
6467666	INCLUDED	INCLUDED	INCLUDED
8131298	INCLUDED	INCLUDED	INCLUDED
18435794	INCLUDED	INCLUDED	INCLUDED
20662858	INCLUDED	INCLUDED	INCLUDED
21108632	INCLUDED	INCLUDED	INCLUDED
29894032	EXCLUDED	EXCLUDED	EXCLUDED	Full text not available
27267192	INCLUDED	INCLUDED	INCLUDED
8193408	INCLUDED	INCLUDED	INCLUDED
710351	EXCLUDED	EXCLUDED	EXCLUDED	Full text not available
27749465	EXCLUDED	EXCLUDED	EXCLUDED	No age of the patient, age-at-death or cause-of-death data in the full text
39993161	EXCLUDED	EXCLUDED	EXCLUDED	No age of the patient, age-at-death or cause-of-death data in the full text
21267004	INCLUDED	INCLUDED	INCLUDED
22549407	INCLUDED	INCLUDED	INCLUDED
33422685	INCLUDED	INCLUDED	INCLUDED
8444237	INCLUDED	INCLUDED	INCLUDED
15726408	INCLUDED	INCLUDED	INCLUDED
19020898	INCLUDED	INCLUDED	INCLUDED
1477072	EXCLUDED	EXCLUDED	EXCLUDED	No clear clinical or genetic diagnosis.
18568998	EXCLUDED	INCLUDED	EXCLUDED	No age of the patient, age-at-death or cause-of-death data in the full text
25946677	EXCLUDED	EXCLUDED	EXCLUDED	Full text not available
26602028	EXCLUDED	EXCLUDED	EXCLUDED	Studies that discuss other topics.
34680903	INCLUDED	INCLUDED	INCLUDED
16440877	INCLUDED	INCLUDED	INCLUDED
22611635	EXCLUDED	EXCLUDED	EXCLUDED	Full text not available
1506207	EXCLUDED	EXCLUDED	EXCLUDED	Full text not available
12913070	INCLUDED	INCLUDED	INCLUDED
16825282	EXCLUDED	EXCLUDED	EXCLUDED	Studies that discuss other topics.
16671095	EXCLUDED	EXCLUDED	EXCLUDED	Studies that discuss other topics.
20139583	EXCLUDED	EXCLUDED	EXCLUDED	No clear clinical or genetic diagnosis.
20827016	INCLUDED	INCLUDED	INCLUDED
22011502	INCLUDED	INCLUDED	INCLUDED
12522278	INCLUDED	INCLUDED	INCLUDED
19383993	INCLUDED	INCLUDED	INCLUDED
15311567	INCLUDED	INCLUDED	INCLUDED
9732012	INCLUDED	INCLUDED	INCLUDED
34830197	INCLUDED	INCLUDED	INCLUDED
12452985	INCLUDED	INCLUDED	INCLUDED
7593806	INCLUDED	INCLUDED	INCLUDED
24034385	EXCLUDED	INCLUDED	INCLUDED
659773	INCLUDED	INCLUDED	INCLUDED
39390869	EXCLUDED	EXCLUDED	EXCLUDED	No clear clinical or genetic diagnosis.
15998779	INCLUDED	INCLUDED	INCLUDED
17848409	INCLUDED	INCLUDED	INCLUDED
18796515	INCLUDED	INCLUDED	INCLUDED
25823488	EXCLUDED	EXCLUDED	EXCLUDED	Studies that discuss other topics.
32036842	EXCLUDED	EXCLUDED	EXCLUDED	No clear clinical or genetic diagnosis.
11426829	INCLUDED	INCLUDED	INCLUDED
10380434	INCLUDED	INCLUDED	INCLUDED
30461078	INCLUDED	INCLUDED	INCLUDED
33590899	INCLUDED	INCLUDED	INCLUDED
15473493	EXCLUDED	EXCLUDED	EXCLUDED	Full text not available
12768443	INCLUDED	INCLUDED	INCLUDED
28878338	INCLUDED	INCLUDED	INCLUDED
17152860	INCLUDED	INCLUDED	INCLUDED
22148005	INCLUDED	INCLUDED	INCLUDED
10087745	INCLUDED	INCLUDED	INCLUDED
284134	INCLUDED	INCLUDED	INCLUDED
2352259	INCLUDED	INCLUDED	INCLUDED
14627682	INCLUDED	INCLUDED	INCLUDED
15121795	EXCLUDED	EXCLUDED	EXCLUDED	Studies that discuss other topics.
25001855	INCLUDED	EXCLUDED	EXCLUDED	Studies that discuss other topics.
2957478	INCLUDED	INCLUDED	INCLUDED
4552697	INCLUDED	INCLUDED	INCLUDED
17642424	EXCLUDED	EXCLUDED	EXCLUDED	Studies that discuss other topics.
6490880	EXCLUDED	EXCLUDED	EXCLUDED	Full text not available
19373113	INCLUDED	INCLUDED	INCLUDED
22433957	INCLUDED	INCLUDED	INCLUDED
19474589	INCLUDED	INCLUDED	INCLUDED
8182686	INCLUDED	INCLUDED	INCLUDED
29710166	INCLUDED	INCLUDED	INCLUDED
25629449	INCLUDED	INCLUDED	INCLUDED
24793088	INCLUDED	INCLUDED	INCLUDED
14463736	EXCLUDED	EXCLUDED	EXCLUDED	Full text not available
7167089	EXCLUDED	EXCLUDED	EXCLUDED	Full text not available
24123119	INCLUDED	INCLUDED	INCLUDED
20150858	INCLUDED	INCLUDED	INCLUDED
32799251	INCLUDED	INCLUDED	INCLUDED
23897869	EXCLUDED	EXCLUDED	EXCLUDED	Duplicate cohort/patients already included in a more complete primary paper
1272599	EXCLUDED	EXCLUDED	EXCLUDED	Full text not available
10591957	INCLUDED	INCLUDED	INCLUDED
20401475	INCLUDED	INCLUDED	INCLUDED
1745628	INCLUDED	INCLUDED	INCLUDED
2080130	EXCLUDED	EXCLUDED	EXCLUDED	No age of the patient, age-at-death or cause-of-death data in the full text
10337683	INCLUDED	INCLUDED	INCLUDED
10990576	INCLUDED	INCLUDED	INCLUDED
11860576	INCLUDED	INCLUDED	INCLUDED
21121943	INCLUDED	INCLUDED	INCLUDED
25556323	INCLUDED	INCLUDED	INCLUDED
34647350	INCLUDED	INCLUDED	INCLUDED
38965877	INCLUDED	INCLUDED	INCLUDED
22746836	INCLUDED	INCLUDED	INCLUDED
34961372	EXCLUDED	EXCLUDED	EXCLUDED	Full text not available
23597553	INCLUDED	INCLUDED	INCLUDED
26627141	EXCLUDED	EXCLUDED	EXCLUDED	No age of the patient, age-at-death or cause-of-death data in the full text
8060427	EXCLUDED	EXCLUDED	EXCLUDED	Studies that discuss other topics.
11842974	INCLUDED	INCLUDED	INCLUDED
1815190	EXCLUDED	EXCLUDED	EXCLUDED	Full text not available
8152880	INCLUDED	INCLUDED	INCLUDED
11494296	INCLUDED	INCLUDED	INCLUDED
17286315	INCLUDED	INCLUDED	INCLUDED
17511383	INCLUDED	INCLUDED	INCLUDED
38808865	INCLUDED	INCLUDED	INCLUDED
24120468	EXCLUDED	EXCLUDED	EXCLUDED	No clear clinical or genetic diagnosis.
19139791	EXCLUDED	EXCLUDED	EXCLUDED	Full text not available
23396468	EXCLUDED	EXCLUDED	EXCLUDED	Full text not available
2278013	EXCLUDED	EXCLUDED	EXCLUDED	No clear clinical or genetic diagnosis.
11201039	INCLUDED	INCLUDED	INCLUDED
28540519	INCLUDED	INCLUDED	INCLUDED
31786425	INCLUDED	EXCLUDED	INCLUDED
663743	INCLUDED	INCLUDED	INCLUDED
19102058	INCLUDED	INCLUDED	INCLUDED
9286026	INCLUDED	INCLUDED	INCLUDED
18844329	INCLUDED	INCLUDED	INCLUDED
24122691	EXCLUDED	EXCLUDED	EXCLUDED	No clear clinical or genetic diagnosis.
31014187	INCLUDED	INCLUDED	INCLUDED
36927562	INCLUDED	INCLUDED	INCLUDED
8128740	INCLUDED	INCLUDED	INCLUDED
7445801	EXCLUDED	EXCLUDED	EXCLUDED	Full text not available
