# Supplementary material
Source: publisher site journal article supplement (doi:10.18632/aging.206389)
Supplement: Supplementary file 5 [file aging-v18i1-206389-supplementary-material-SD8.xlsx]

## Sheet: Familial clustering in  HGPS
PMID	First Author	Year	No. of patients	Main reason for exclusion	Detailed explanation
2389799	Parkash H	1990	2	Familial clustering	Affected sibling pair, inconsistent with the sporadic (de novo) nature of classical HGPS. Additionally, clinical and/or photographic features were not concordant with classical descriptions and no genetic confirmation was provided.
3228132	Maciel AT	1988	1	Familial clustering	Multiple affected relatives across generations, including paternal half-siblings and sibling recurrence (one affected pregnancy loss), inconsistent with the sporadic (de novo) nature of classical HGPS. Additionally, clinical and/or photographic features were not concordant with classical descriptions and no genetic confirmation was provided.
2721021	Khalifa MM	1989	3	Familial clustering	Multiple affected relatives within consanguineous kindreds (cousins and sibling pair), inconsistent with sporadic nature of classical HGPS. Additionally, no genetic confirmation was reported.
2278013	Monu JU	1990	3	Familial clustering	Three affected siblings (with mention of a fourth deceased sibling), inconsistent with the sporadic (de novo) nature of classical HGPS. Additionally, clinical and/or photographic features were not concordant with classical descriptions and no genetic confirmation was provided.
2012735	Sood S	1991	2	Familial clustering	Affected sibling pair, inconsistent with the sporadic (de novo) nature of classical HGPS. Additionally, clinical documentation was limited and no genetic confirmation was provided.
